# Supplementary material
Source: MDPI journal article supplement (https://www.mdpi.com/2225-1154/9/9/140)
Supplement: s1 [file s1]

**Table S1.** The 32 models and modeling groups that provided Coupled Model Intercomparison Project phase 5 (CMIP5) data used in this study.

| #  | Model          | Center                                                                                                                                                                    |
|----|----------------|---------------------------------------------------------------------------------------------------------------------------------------------------------------------------|
| 1  | ACCESS1.0      | Commonwealth Scientific and Industrial Research Organization (CSIRO) and Bureau of Meteorology (BOM), Australia                                                           |
| 2  | ACCESS1.3      | Commonwealth Scientific and Industrial Research Organization (CSIRO) and Bureau of Meteorology (BOM), Australia                                                           |
| 3  | BCC-CSM1.1(m)  | Beijing Climate Center, China Meteorological Administration                                                                                                               |
| 4  | BCC-CSM1.1     | Beijing Climate Center, China Meteorological Administration                                                                                                               |
| 5  | CanESM2        | Canadian Centre for Climate Modelling and Analysis                                                                                                                        |
| 6  | CCSM4          | National Center for Atmospheric Research                                                                                                                                  |
| 7  | CESM1(BGC)     | Community Earth System Model Contributors                                                                                                                                 |
| 8  | CESM1(CAM5)    | Community Earth System Model Contributors                                                                                                                                 |
| 9  | CMCC-CM        | Centro Euro-Mediterraneo per I Cambiamenti Climatic                                                                                                                       |
| 10 | CMCC-CMS       | Centro Euro-Mediterraneo per I Cambiamenti Climatic                                                                                                                       |
| 11 | CNRM-CM5       | Centre National de Recherches Météorologiques / Centre Européen de Recherche et Formation Avancée en Calcul Scientifique                                                  |
| 12 | CSIRO-Mk3.6.0  | Commonwealth Scientific and Industrial Research Organization in collaboration with Queensland Climate Change Centre of Excellence                                         |
| 13 | EC-EARTH       | EC-EARTH consortium                                                                                                                                                       |
| 14 | FGOALS-g2      | LASG, Institute of Atmospheric Physics, Chinese Academy of Sciences and CESS, Tsinghua University                                                                         |
| 15 | GFDL-CM3       | NOAA Geophysical Fluid Dynamics Laboratory                                                                                                                                |
| 16 | GFDL-ESM2G     | NOAA Geophysical Fluid Dynamics Laboratory                                                                                                                                |
| 17 | GFDL-ESM2M     | NOAA Geophysical Fluid Dynamics Laboratory                                                                                                                                |
| 18 | GISS-E2-H      | NASA Goddard Institute for Space Studies                                                                                                                                  |
| 19 | GISS-E2-R      | NASA Goddard Institute for Space Studies                                                                                                                                  |
| 20 | HadGEM2-AO     | National Institute of Meteorological Research/Korea Meteorological Administration                                                                                         |
| 21 | HadGEM2-CC     | Met Office Hadley Centre (additional HadGEM2-ES realizations contributed by Instituto Nacional de Pesquisas Espaciais)                                                    |
| 22 | HadGEM2-ES     | Met Office Hadley Centre (additional HadGEM2-ES realizations contributed by Instituto Nacional de Pesquisas Espaciais)                                                    |
| 23 | INM-CM4        | Institute for Numerical Mathematics                                                                                                                                       |
| 24 | IPSL-CM5A-LR   | Institut Pierre-Simon Laplace                                                                                                                                             |
| 25 | IPSL-CM5A-MR   | Institut Pierre-Simon Laplace                                                                                                                                             |
| 26 | MIROC-ESM-CHEM | Japan Agency for Marine-Earth Science and Technology, Atmosphere and Ocean Research Institute (The University of Tokyo), and National Institute for Environmental Studies |
| 27 | MIROC-ESM      | Japan Agency for Marine-Earth Science and Technology, Atmosphere and Ocean Research Institute (The University of Tokyo), and National Institute for Environmental Studies |
| 28 | MIROC5         | Atmosphere and Ocean Research Institute (The University of Tokyo), National Institute for Environmental Studies, and Japan Agency for Marine-Earth Science and Technology |
| 29 | MPI-ESM-LR     | Max-Planck-Institut für Meteorologie (Max Planck Institute for Meteorology)                                                                                               |
| 30 | MPI-ESM-MR     | Max-Planck-Institut für Meteorologie (Max Planck Institute for Meteorology)                                                                                               |
| 31 | MRI-CGCM3      | Meteorological Research Institute                                                                                                                                         |

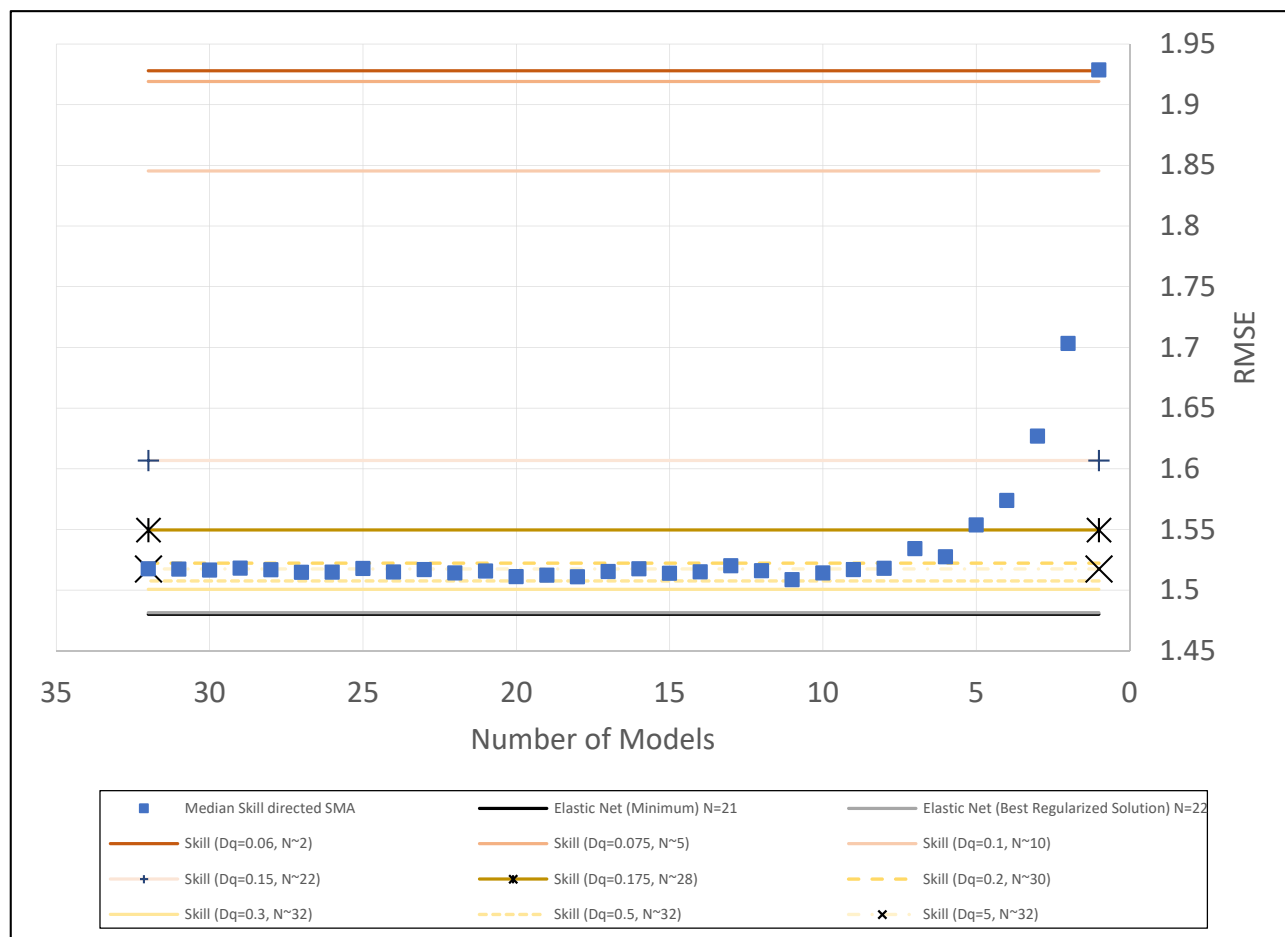

**Figure S1.** For the Willamette Valley American Viticultural Area (AVA) and growing degree days (GDD), computed root mean squared error (RMSE) values obtained by comparing GDD specific processed daily Localized Constructed Analogs (LOCA) Coupled Model Intercomparison Project phase 5 (CMIP5) model historic datasets [40,41] with their equivalently processed observed data counterparts [18,42] using skill weighting, with various values for its radius of model equality,  $D_q$  [17,23], model median skill directed simple model averaging (SMA), and elastic-net regularization [33]. N denotes the number of LOCA CMIP5 models defining the ensemble.

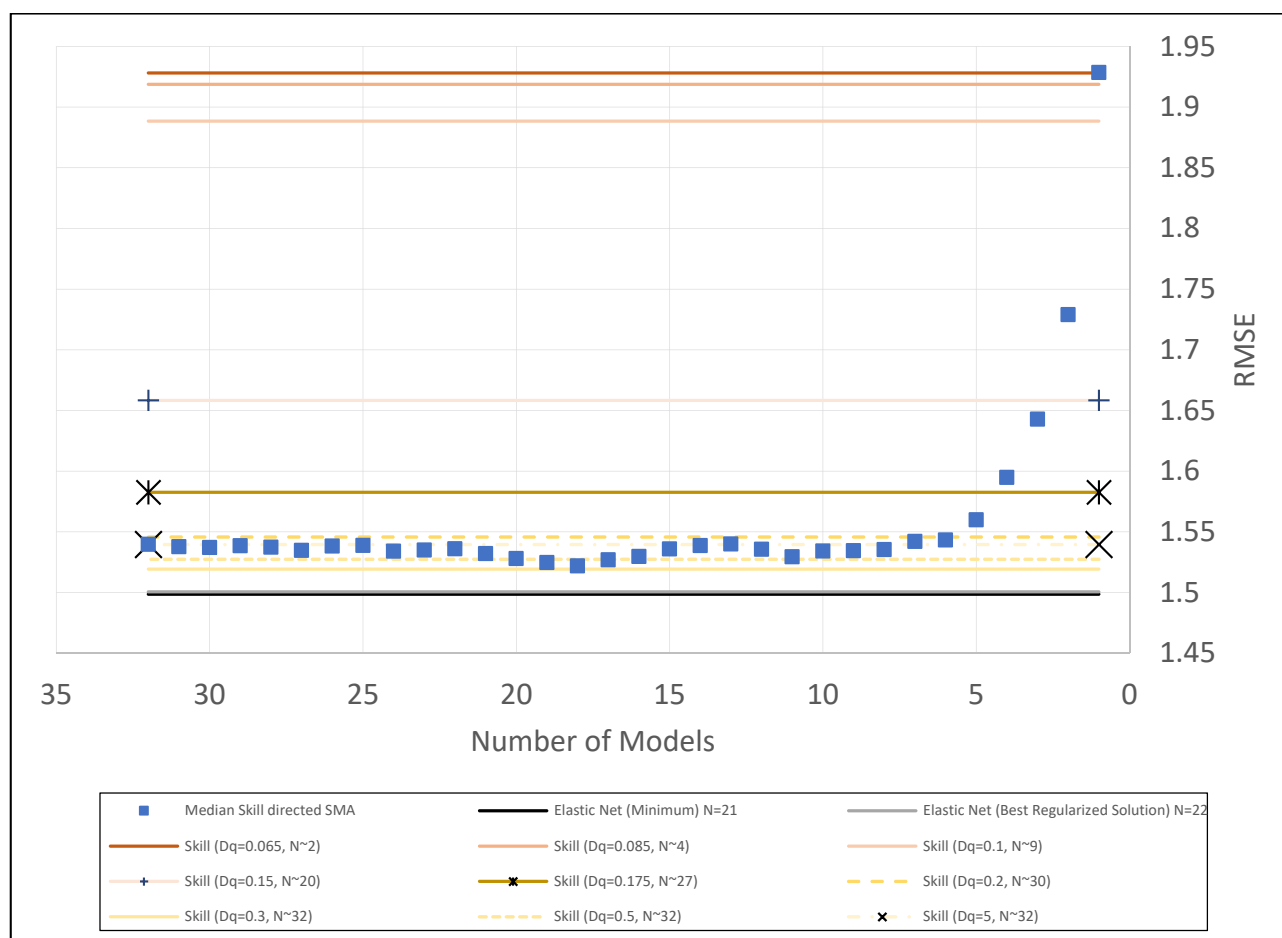

**Figure S2.** For the Willamette Valley American Viticultural Area (AVA) and Huglin index (HI), computed root mean squared error (RMSE) values obtained by comparing HI specific processed daily Localized Constructed Analogs (LOCA) Coupled Model Intercomparison Project phase 5 (CMIP5) model historic datasets [40,41] with their equivalently processed observed data counterparts [18,42] using skill weighting, with various values for its radius of model equality,  $D_q$  [17,23], model median skill directed simple model averaging (SMA), and elastic-net regularization [33]. N denotes the number of LOCA CMIP5 models defining the ensemble.

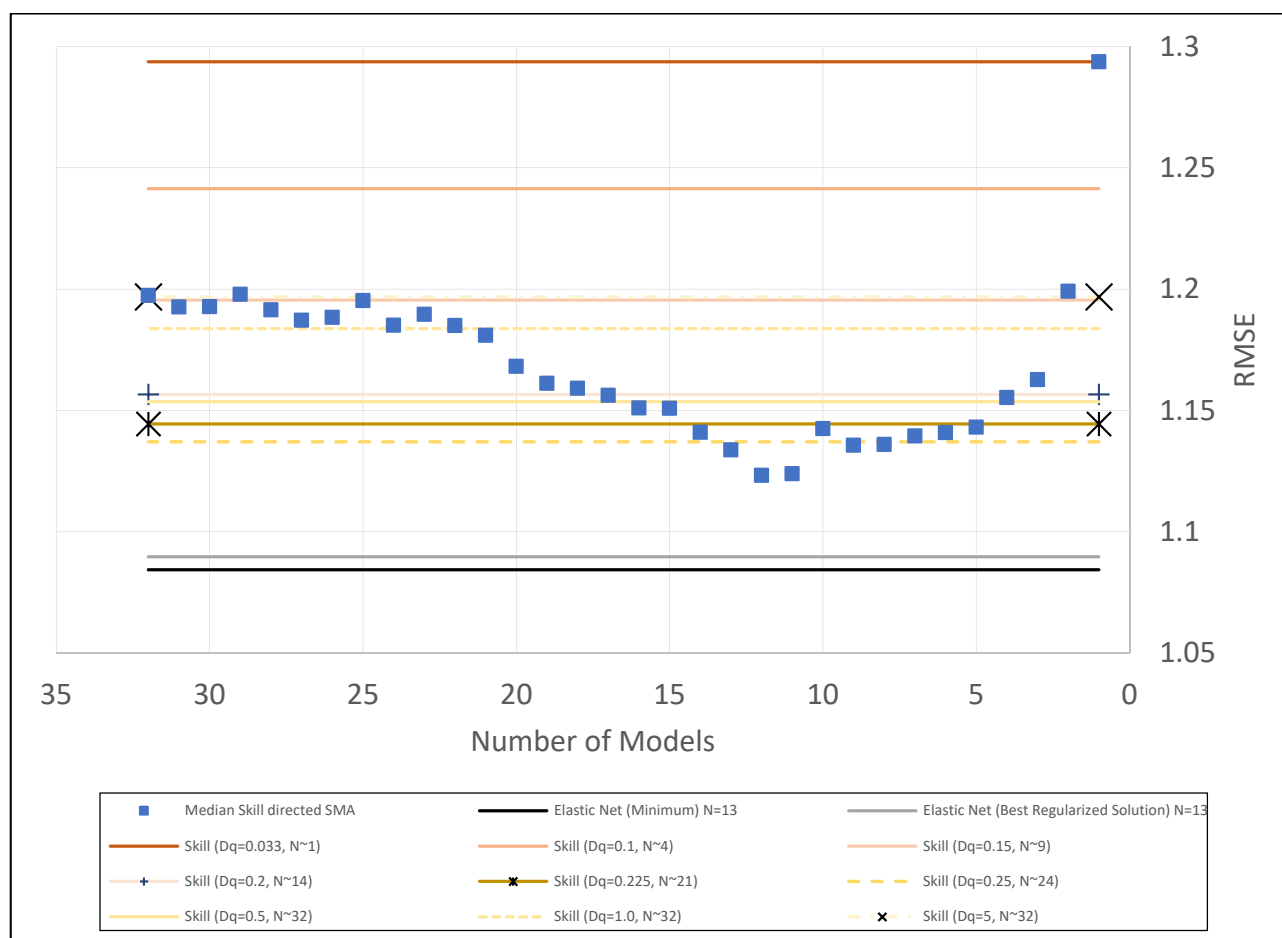

**Figure S3.** For the Willamette Valley American Viticultural Area (AVA) and cool night index (CI), computed root mean squared error (RMSE) values obtained by comparing CI specific processed daily Localized Constructed Analogs (LOCA) Coupled Model Intercomparison Project phase 5 (CMIP5) model historic datasets [40,41] with their equivalently processed observed data counterparts [18,42] using skill weighting, with various values for its radius of model equality,  $D_q$  [17,23], model median skill directed simple model averaging (SMA), and elastic-net regularization [33]. N denotes the number of LOCA CMIP5 models defining the ensemble.

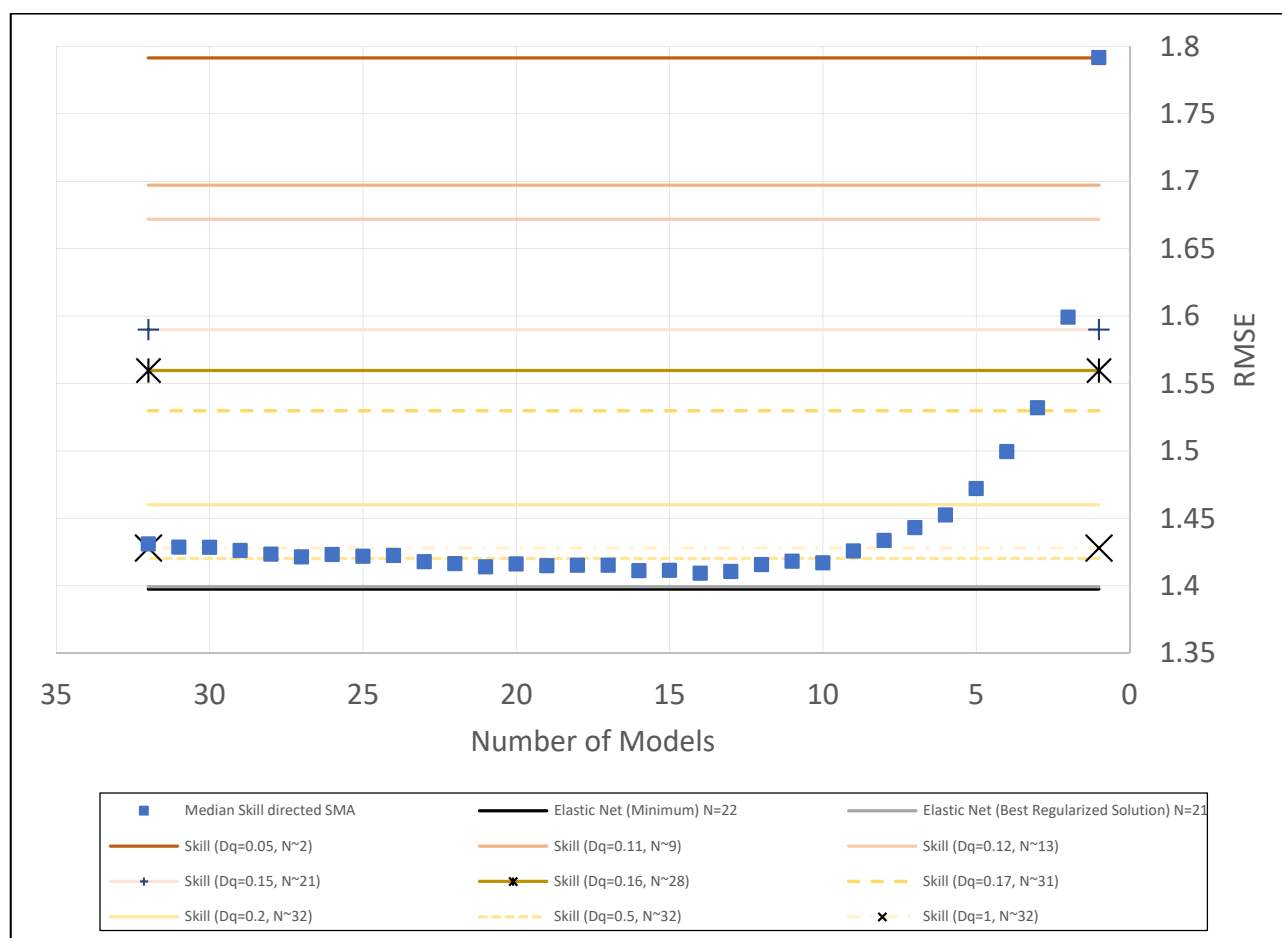

**Figure S4.** For the Willamette Valley American Viticultural Area (AVA) and dryness index (DI), computed root mean squared error (RMSE) values obtained by comparing DI specific processed daily Localized Constructed Analogs (LOCA) Coupled Model Intercomparison Project phase 5 (CMIP5) model historic datasets [40,41] with their equivalently processed observed data counterparts [18,42] using skill weighting, with various values for its radius of model equality,  $D_q$  [17,23], model median skill directed simple model averaging (SMA), and elastic-net regularization [33]. N denotes the number of LOCA CMIP5 models defining the ensemble.

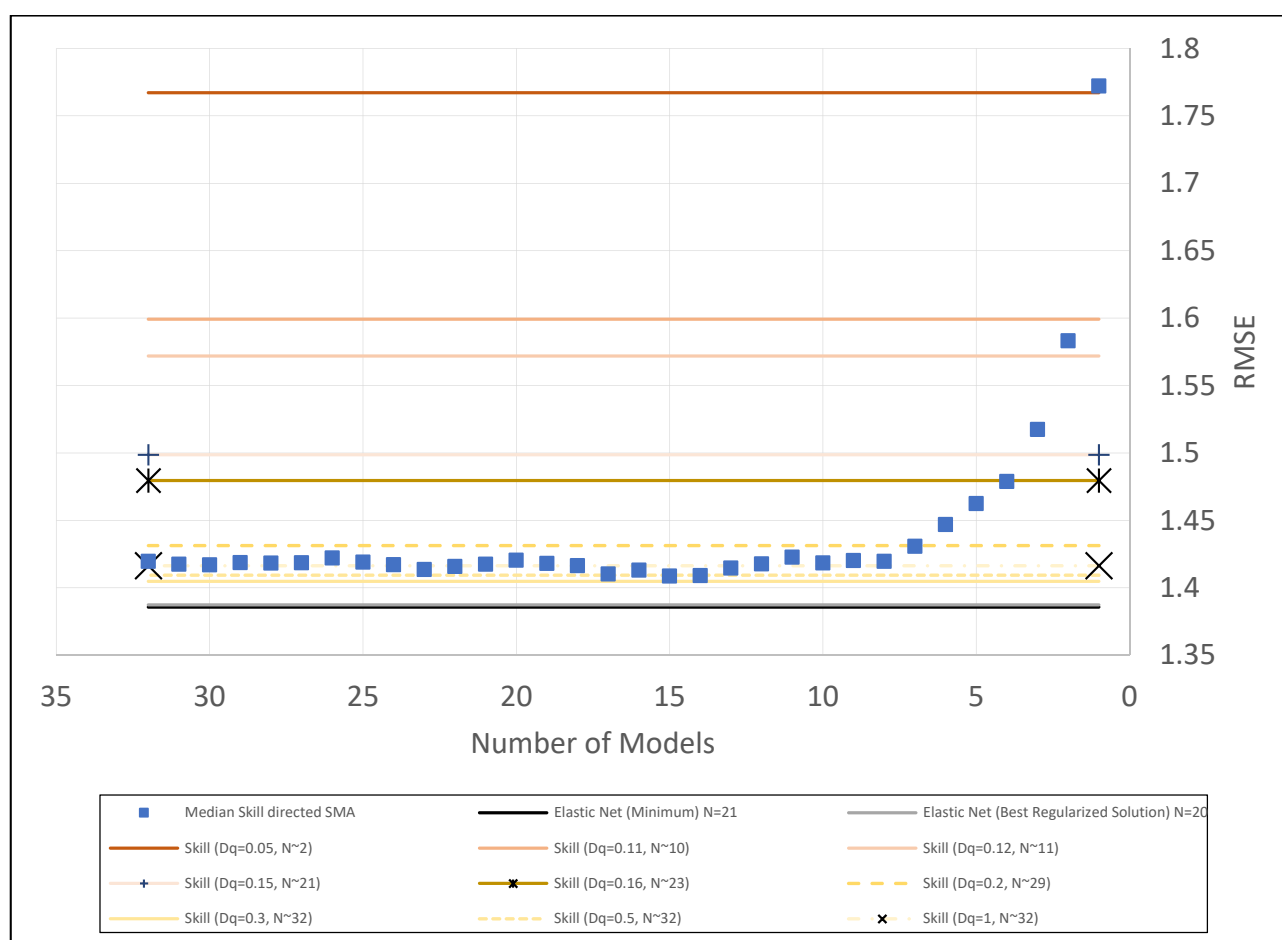

**Figure S5.** For the Willamette Valley American Viticultural Area (AVA) and Géoviticulture multicriteria climate classification (GMCC), computed root mean squared error (RMSE) values obtained by comparing GMCC specific processed daily Localized Constructed Analogs (LOCA) Coupled Model Intercomparison Project phase 5 (CMIP5) model historic datasets [40,41] with their equivalently processed observed data counterparts [18,42] using skill weighting, with various values for its radius of model equality,  $D_q$  [17,23], model median skill directed simple model averaging (SMA), and elastic-net regularization [33]. N denotes the number of LOCA CMIP5 models defining the ensemble.
